# Supplementary material for: Post-Recovery Relapse of Children Treated with a Simplified, Combined Nutrition Treatment Protocol in Mali: A Prospective Cohort Study
Source: MDPI journal article supplement (doi:10.3390/nu15112636), 2023-06-05
Supplement: s1 [file s1]

# Post-Recovery Relapse of Children Treated with a Simplified, Combined Nutrition Treatment Protocol in Mali: A Prospective Cohort Study

Table S1. Cumulative incidence and incidence rate of relapse to MUAC &lt;115 mm and/or edema

|                                                         | MUAC and edema status at admission to treatment |                 |                           |                  |                             |                 |
|---------------------------------------------------------|-------------------------------------------------|-----------------|---------------------------|------------------|-----------------------------|-----------------|
|                                                         | MUAC <125 mm and/or edema                       |                 | MUAC <115 mm and/or edema |                  | MUAC 115 mm to MUAC <125 mm |                 |
|                                                         | n/N                                             | % [95%CI]       | n/N                       | % [95%CI]        | n/N                         | % [95%CI]       |
| <b>Cumulative incidence over the 6 months follow-up</b> |                                                 |                 |                           |                  |                             |                 |
| All children enrolled                                   | 6 / 389                                         | 1.5 [0.6 ; 3.3] | 4 / 103                   | 3.9 [1.1 ; 9.6]  | 2 / 286                     | 0.7 [0.1 ; 2.5] |
| Non-drop outs                                           | 6 / 355                                         | 1.7 [0.6 ; 3.6] | 4 / 94                    | 4.3 [1.2 ; 10.5] | 2 / 261                     | 0.8 [0.1 ; 2.7] |
| <b>Incidence rates (per 100 child-months)</b>           |                                                 |                 |                           |                  |                             |                 |
| First 3 months                                          | 5 / 1136                                        | 0.4 [0.2 ; 1.1] | 3 / 305                   | 1.0 [0.3 ; 3.0]  | 2 / 830                     | 0.2 [0.1 ; 1.0] |
| Latter 3 months                                         | 1 / 909                                         | 0.1 [0.0 ; 0.8] | 7 / 235                   | 0.4 [0.1 ; 3.0]  | 0 / 674                     |                 |
| Full 6 months                                           | 6 / 2045                                        | 0.3 [0.1 ; 0.7] | 4 / 540                   | 0.7 [0.3 ; 2.0]  | 2 / 1505                    | 0.1 [0.0 ; 0.5] |

**Table S2.** Associations of different characteristics (as categorical variables) with the 6-month incidence of relapse among children discharged as recovered following treatment with the simplified protocol in 10 randomly selected health areas of the Nara district in Mali

|                                                                        |        |       |               |                  | Unadjusted         |         | Sex and age adjusted |         |
|------------------------------------------------------------------------|--------|-------|---------------|------------------|--------------------|---------|----------------------|---------|
|                                                                        |        |       |               |                  | HR [95%CI]         | p-value | HR [95%CI]           | p-value |
|                                                                        |        |       |               |                  |                    |         |                      |         |
| 1. Demographic and admission characteristics to malnutrition treatment |        |       |               |                  |                    |         |                      |         |
|                                                                        |        |       |               |                  |                    |         |                      |         |
| Sex                                                                    | Yes, n | No, n | Proportion, % | FU time (months) |                    |         |                      |         |
| Female                                                                 | 51     | 167   | 23.4%         | 4.8              | Ref                |         | Ref                  |         |
| Male                                                                   | 48     | 154   | 23.8%         | 4.9              | 1.01 [0.68 ; 1.50] | 0.969   | 0.98 [0.66 ; 1.46]   | 0.911   |
|                                                                        |        |       |               |                  |                    |         |                      |         |
| Age category                                                           |        |       |               |                  |                    |         |                      |         |
| ≥24mo                                                                  | 6      | 56    | 9.7%          | 5.2              | Ref                |         | Ref                  |         |
| <24m                                                                   | 93     | 265   | 26.0%         | 4.8              | 2.85 [1.24 ; 6.52] | 0.013   | 1.20 [0.43 ; 3.37]   | 0.731   |
|                                                                        |        |       |               |                  |                    |         |                      |         |
| WAZ category                                                           |        |       |               |                  |                    |         |                      |         |
| ≥-3                                                                    | 54     | 177   | 23.4%         | 4.8              | Ref                |         | Ref                  |         |
| <-3                                                                    | 45     | 144   | 23.8%         | 4.9              | 1.04 [0.69 ; 1.56] | 0.850   | 1.41 [0.92 ; 2.17]   | 0.118   |
|                                                                        |        |       |               |                  |                    |         |                      |         |
| WHZ category                                                           |        |       |               |                  |                    |         |                      |         |
| ≥-3                                                                    | 45     | 141   | 24.2%         | 4.7              | Ref                |         | Ref                  |         |
| <-3                                                                    | 24     | 60    | 28.6%         | 4.6              | 1.18 [0.73 ; 1.91] | 0.497   | 1.35 [0.83 ; 2.21]   | 0.228   |
|                                                                        |        |       |               |                  |                    |         |                      |         |
| HAZ category                                                           |        |       |               |                  |                    |         |                      |         |
| ≥-3                                                                    | 51     | 148   | 25.6%         | 4.7              | Ref                |         | Ref                  |         |
| <-3                                                                    | 18     | 53    | 25.4%         | 4.7              | 1.10 [0.69 ; 1.75] | 0.688   | 1.49 [0.92 ; 2.42]   | 0.106   |
|                                                                        |        |       |               |                  |                    |         |                      |         |
| MUAC category                                                          |        |       |               |                  |                    |         |                      |         |
| ≥115 <125mm                                                            | 73     | 235   | 23.7%         | 4.9              | Ref                |         | Ref                  |         |
| <115mm                                                                 | 26     | 86    | 23.2%         | 4.8              | 1.14 [0.72 ; 1.82] | 0.568   | 1.17 [0.74 ; 1.85]   | 0.511   |
|                                                                        |        |       |               |                  |                    |         |                      |         |
| Treatment level                                                        |        |       |               |                  |                    |         |                      |         |
| health center                                                          | 69     | 203   | 25%           | 4.7              | Ref                |         | Ref                  |         |
| community health site                                                  | 30     | 118   | 20%           | 5.2              | 0.67 [0.42 ; 1.06] | 0.090   | 0.73 [0.46 ; 1.17]   | 0.192   |
|                                                                        |        |       |               |                  |                    |         |                      |         |
| 2. Characteristics at discharge recovered from treatment               |        |       |               |                  |                    |         |                      |         |
|                                                                        |        |       |               |                  |                    |         |                      |         |
| WAZ category                                                           |        |       |               |                  |                    |         |                      |         |

|                                                                            |    |     |       |     |                    |        |                    |        |
|----------------------------------------------------------------------------|----|-----|-------|-----|--------------------|--------|--------------------|--------|
| ≥-3                                                                        | 82 | 282 | 22.5% | 4.9 | Ref                |        | Ref                |        |
| <-3                                                                        | 16 | 33  | 32.7% | 4.4 | 1.70 [0.99 ; 2.94] | 0.056  | 3.09 [1.69 ; 5.62] | <0.001 |
| <b>WHZ category</b>                                                        |    |     |       |     |                    |        |                    |        |
| ≥-2                                                                        | 66 | 208 | 24.1% | 4.8 | Ref                |        | Ref                |        |
| <-2                                                                        | 16 | 36  | 30.8% | 4.5 | 1.39 [0.84 ; 2.29] | 0.199  | 1.67 [1.00 ; 2.79] | 0.052  |
| <b>HAZ category</b>                                                        |    |     |       |     |                    |        |                    |        |
| ≥-3                                                                        | 59 | 182 | 24.5% | 4.8 | Ref                |        | Ref                |        |
| <-3                                                                        | 23 | 63  | 26.7% | 4.7 | 1.28 [0.83 ; 1.99] | 0.26   | 1.76 [1.11 ; 2.78] | 0.016  |
| <b>MUAC category</b>                                                       |    |     |       |     |                    |        |                    |        |
| ≥130mm                                                                     | 14 | 118 | 10.6% | 5.3 | Ref                |        | Ref                |        |
| <130mm                                                                     | 85 | 203 | 29.5% | 4.7 | 3.21 [1.82 ; 5.68] | <0.001 | 2.90 [1.63 ; 5.14] | <0.001 |
| <b>Availability of a vaccination card at enrol-<br/>ment</b>               |    |     |       |     |                    |        |                    |        |
| Yes                                                                        | 34 | 129 | 20.9% | 5.0 | Ref                |        | Ref                |        |
| No                                                                         | 65 | 192 | 25.3% | 4.8 | 1.25 [0.81 ; 1.93] | 0.31   | 1.57 [1.01 ; 2.45] | 0.047  |
| <b>Child's vaccine status is up to date at enrol-<br/>ment</b>             |    |     |       |     |                    |        |                    |        |
| Yes                                                                        | 20 | 67  | 23.0% | 4.7 | Ref                |        | Ref                |        |
| No                                                                         | 14 | 62  | 18.4% | 5.4 | 0.69 [0.32 ; 1.46] | 0.33   | 0.73 [0.34 ; 1.56] | 0.42   |
| <b>Length of stay above median (=39d)</b>                                  |    |     |       |     |                    |        |                    |        |
| No                                                                         | 39 | 171 | 18.6% | 5.0 | Ref                |        | Ref                |        |
| Yes                                                                        | 60 | 150 | 28.6% | 4.7 | 1.86 [1.22 ; 2.82] | 0.004  | 1.83 [1.21 ; 2.78] | 0.005  |
| <b>3. Socio-economic characteristics collected at<br/>first home visit</b> |    |     |       |     |                    |        |                    |        |
| <b>Larger than average (n=21) household size</b>                           |    |     |       |     |                    |        |                    |        |
| No                                                                         | 30 | 127 | 19.1% | 5.0 | Ref                |        | Ref                |        |
| Yes                                                                        | 69 | 194 | 26.2% | 4.8 | 1.52 [0.96 ; 2.41] | 0.072  | 1.49 [0.94 ; 2.37] | 0.089  |
| <b>More than 5 children U5 in the household</b>                            |    |     |       |     |                    |        |                    |        |
| No                                                                         | 31 | 120 | 20.5% | 5.0 | Ref                |        | Ref                |        |
| Yes                                                                        | 68 | 201 | 25.3% | 4.8 | 1.25 [0.79 ; 1.97] | 0.34   | 1.33 [0.85 ; 2.10] | 0.22   |

|                                                             |    |     |       |     |                    |       |                    |  |       |
|-------------------------------------------------------------|----|-----|-------|-----|--------------------|-------|--------------------|--|-------|
| <b>Main source of income is from agriculture</b>            |    |     |       |     |                    |       |                    |  |       |
| Yes                                                         | 71 | 265 | 21.1% | 5.1 | Ref                |       | Ref                |  |       |
| No                                                          | 26 | 51  | 33.8% | 4.4 | 1.84 [1.14 ; 2.95] | 0.012 | 1.76 [1.09 ; 2.84] |  | 0.020 |
| <b>Caregiver has other occupation that housewife duties</b> |    |     |       |     |                    |       |                    |  |       |
| Yes                                                         | 22 | 87  | 20.2% | 5.0 | Ref                |       | Ref                |  |       |
| No                                                          | 75 | 229 | 24.7% | 4.9 | 0.98 [0.55 ; 1.74] | 0.94  | 1.03 [0.58 ; 1.83] |  | 0.93  |
| <b>Household uses an improved water source</b>              |    |     |       |     |                    |       |                    |  |       |
| Yes                                                         | 61 | 220 | 21.7% | 5.0 | Ref                |       | Ref                |  |       |
| No                                                          | 36 | 96  | 27.3% | 4.8 | 1.96 [1.14 ; 3.36] | 0.015 | 1.93 [1.16 ; 3.20] |  | 0.012 |
| <b>Household uses a product to treat drinking water</b>     |    |     |       |     |                    |       |                    |  |       |
| Yes                                                         | 84 | 257 | 24.6% | 5.0 | Ref                |       | Ref                |  |       |
| No                                                          | 13 | 59  | 18.1% | 4.9 | 1.39 [0.76 ; 2.57] | 0.29  | 1.58 [0.85 ; 2.91] |  | 0.146 |
| <b>Household uses a latrine</b>                             |    |     |       |     |                    |       |                    |  |       |
| Yes                                                         | 59 | 165 | 26.3% | 4.8 | Ref                |       | Ref                |  |       |
| No                                                          | 38 | 151 | 20.1% | 5.1 | 0.76 [0.49 ; 1.20] | 0.24  | 0.80 [0.51 ; 1.26] |  | 0.34  |
| <b>Child appears unclean</b>                                |    |     |       |     |                    |       |                    |  |       |
| No                                                          | 74 | 227 | 24.6% | 4.9 | Ref                |       | Ref                |  |       |
| Yes                                                         | 25 | 89  | 21.9% | 4.9 | 1.00 [0.60 ; 1.67] | 0.99  | 1.23 [0.74 ; 2.05] |  | 0.43  |
| <b>Little or no hunger in household</b>                     |    |     |       |     |                    |       |                    |  |       |
| Yes                                                         | 83 | 300 | 21.7% | 5.1 | Ref                |       | Ref                |  |       |
| No                                                          | 6  | 7   | 46.2% | 4.3 | 2.47 [1.05 ; 5.77] | 0.037 | 2.22 [0.95 ; 5.18] |  | 0.066 |
| <b>4. Dietary habits collected at first home visit</b>      |    |     |       |     |                    |       |                    |  |       |
| <b>Breastfeeding</b>                                        |    |     |       |     |                    |       |                    |  |       |
| No                                                          | 29 | 142 | 28.7% | 5.1 | Ref                |       | Ref                |  |       |
| Yes                                                         | 70 | 174 | 17.0% | 4.8 | 1.73 [1.12 ; 2.68] | 0.014 | 0.92 [0.52 ; 1.64] |  | 0.78  |
| <b>Attained MDD</b>                                         |    |     |       |     |                    |       |                    |  |       |
| Yes                                                         | 0  | 4   | 0%    | 6.0 | Ref                |       | Ref                |  |       |
| No                                                          | 83 | 217 | 28.0% | 4.8 | NA                 |       | NA                 |  |       |
| <b>Attained MDF</b>                                         |    |     |       |     |                    |       |                    |  |       |

|                                                                           |    |     |       |     |                     |        |                     |        |
|---------------------------------------------------------------------------|----|-----|-------|-----|---------------------|--------|---------------------|--------|
| Yes                                                                       | 43 | 92  | 31.9% | 4.7 | Ref                 |        | Ref                 |        |
| No                                                                        | 40 | 129 | 23.7% | 4.9 | 0.70 [0.44 ; 1.12]  | 0.136  | 0.80 [0.49 ; 1.30]  | 0.37   |
| <b>5. Morbidity during follow-up</b>                                      |    |     |       |     |                     |        |                     |        |
| <b>Above average total number of sick days during follow-up</b>           |    |     |       |     |                     |        |                     |        |
| No (≤15)                                                                  | 54 | 183 | 22.8% | 4.6 | Ref                 |        | Ref                 |        |
| Yes (>15)                                                                 | 45 | 138 | 24.6% | 5.3 | 0.85 [0.56 ; 1.30]  | 0.46   | 0.76 [0.50 ; 1.16]  | 0.20   |
| <b>Above average (&gt;3.5) number of sick days per month of follow-up</b> |    |     |       |     |                     |        |                     |        |
| No (≤3.5)                                                                 | 23 | 243 | 8.7%  | 5.3 | Ref                 |        | Ref                 |        |
| Yes (>3.5)                                                                | 76 | 78  | 49.4% | 4.0 | 8.38 [5.14 ; 13.66] | <0.001 | 7.57 [4.62 ; 12.42] | <0.001 |
| <b>Child sick at least once during follow-up</b>                          |    |     |       |     |                     |        |                     |        |
| No                                                                        | 96 | 302 | 24.1% | 5.0 | Ref                 |        | Ref                 |        |
| Yes                                                                       | 3  | 14  | 17.7% | 2.7 | 1.30 [0.40 ; 4.18]  | 0.66   | 1.28 [0.40 ; 4.16]  | 0.68   |
| <b>Caregiver sought formal care when the child was sick</b>               |    |     |       |     |                     |        |                     |        |
| Yes                                                                       | 75 | 263 | 22.2% | 5.0 | Ref                 |        | Ref                 |        |
| No                                                                        | 21 | 39  | 35.0% | 5.0 | 1.29 [0.76 ; 2.19]  | 0.35   | 1.16 [0.68 ; 1.95]  | 0.59   |
| <b>6. Changes in the household level during follow-up</b>                 |    |     |       |     |                     |        |                     |        |
| <b>Income has decreased during follow-up</b>                              |    |     |       |     |                     |        |                     |        |
| No                                                                        | 76 | 255 | 23.0% | 5.0 | Ref                 |        | Ref                 |        |
| Yes                                                                       | 16 | 55  | 22.5% | 5.4 | 0.65 [0.35 ; 1.20]  | 0.167  | 0.69 [0.37 ; 1.28]  | 0.24   |
| <b>Increase in caregivers activities during follow-up</b>                 |    |     |       |     |                     |        |                     |        |
| No                                                                        | 71 | 223 | 24.2% | 4.9 | Ref                 |        | Ref                 |        |
| Yes                                                                       | 21 | 87  | 19.4% | 5.6 | 0.33 [0.18 ; 0.58]  | <0.001 | 0.32 [0.18 ; 0.57]  | <0.001 |
| <b>Increase in hunger during the follow-up</b>                            |    |     |       |     |                     |        |                     |        |
| No                                                                        | 89 | 301 | 22.8% | 5.1 | Ref                 |        | Ref                 |        |
| Yes                                                                       | 3  | 9   | 25.0% | 5.2 | 2.78 [0.66 ; 11.78] | 0.164  | 3.60 [0.82 ; 15.72] | 0.089  |

\* only adjusted for sex

Abbreviations: FU, follow-up; HAZ, height-for-age z-score; HR, hazard ratio; MDD, minimum dietary diversity; MDF, minimum dietary frequency; MUAC, mid-upper arm circumference; U5, under 5 years of age; WAZ, weight-for-age z-score; WHZ, weight-for-height z-score.
